# Supplementary material for: Genome-based classification of Burkholderia cepacia complex provides new insight into its taxonomic status
Source: Springer Nature journal article supplement (doi:10.1186/s13062-020-0258-5), 2020-03-04

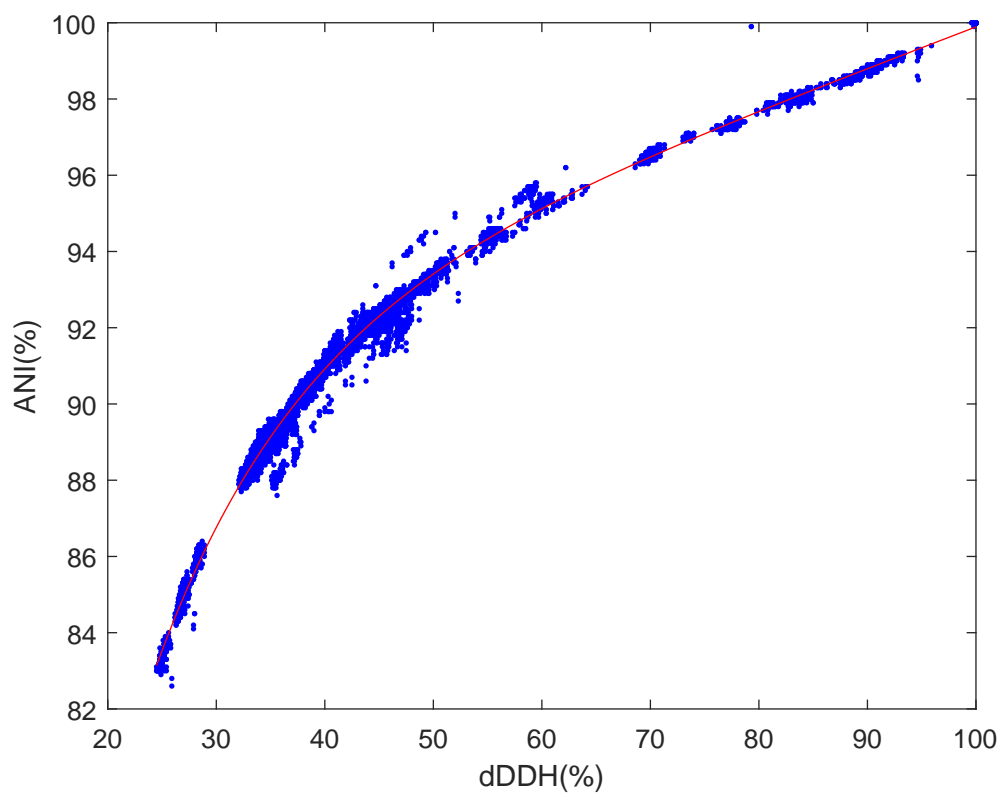

Supplement: 13062_2020_258_MOESM5_ESM.pdf [file 13062_2020_258_MOESM5_ESM.pdf]
