# Supplementary material for: Genome-based classification of Burkholderia cepacia complex provides new insight into its taxonomic status
Source: PubMed Central journal article supplement (PMC7057466; doi:10.1186/s13062-020-0258-5), 2020-03-04

A

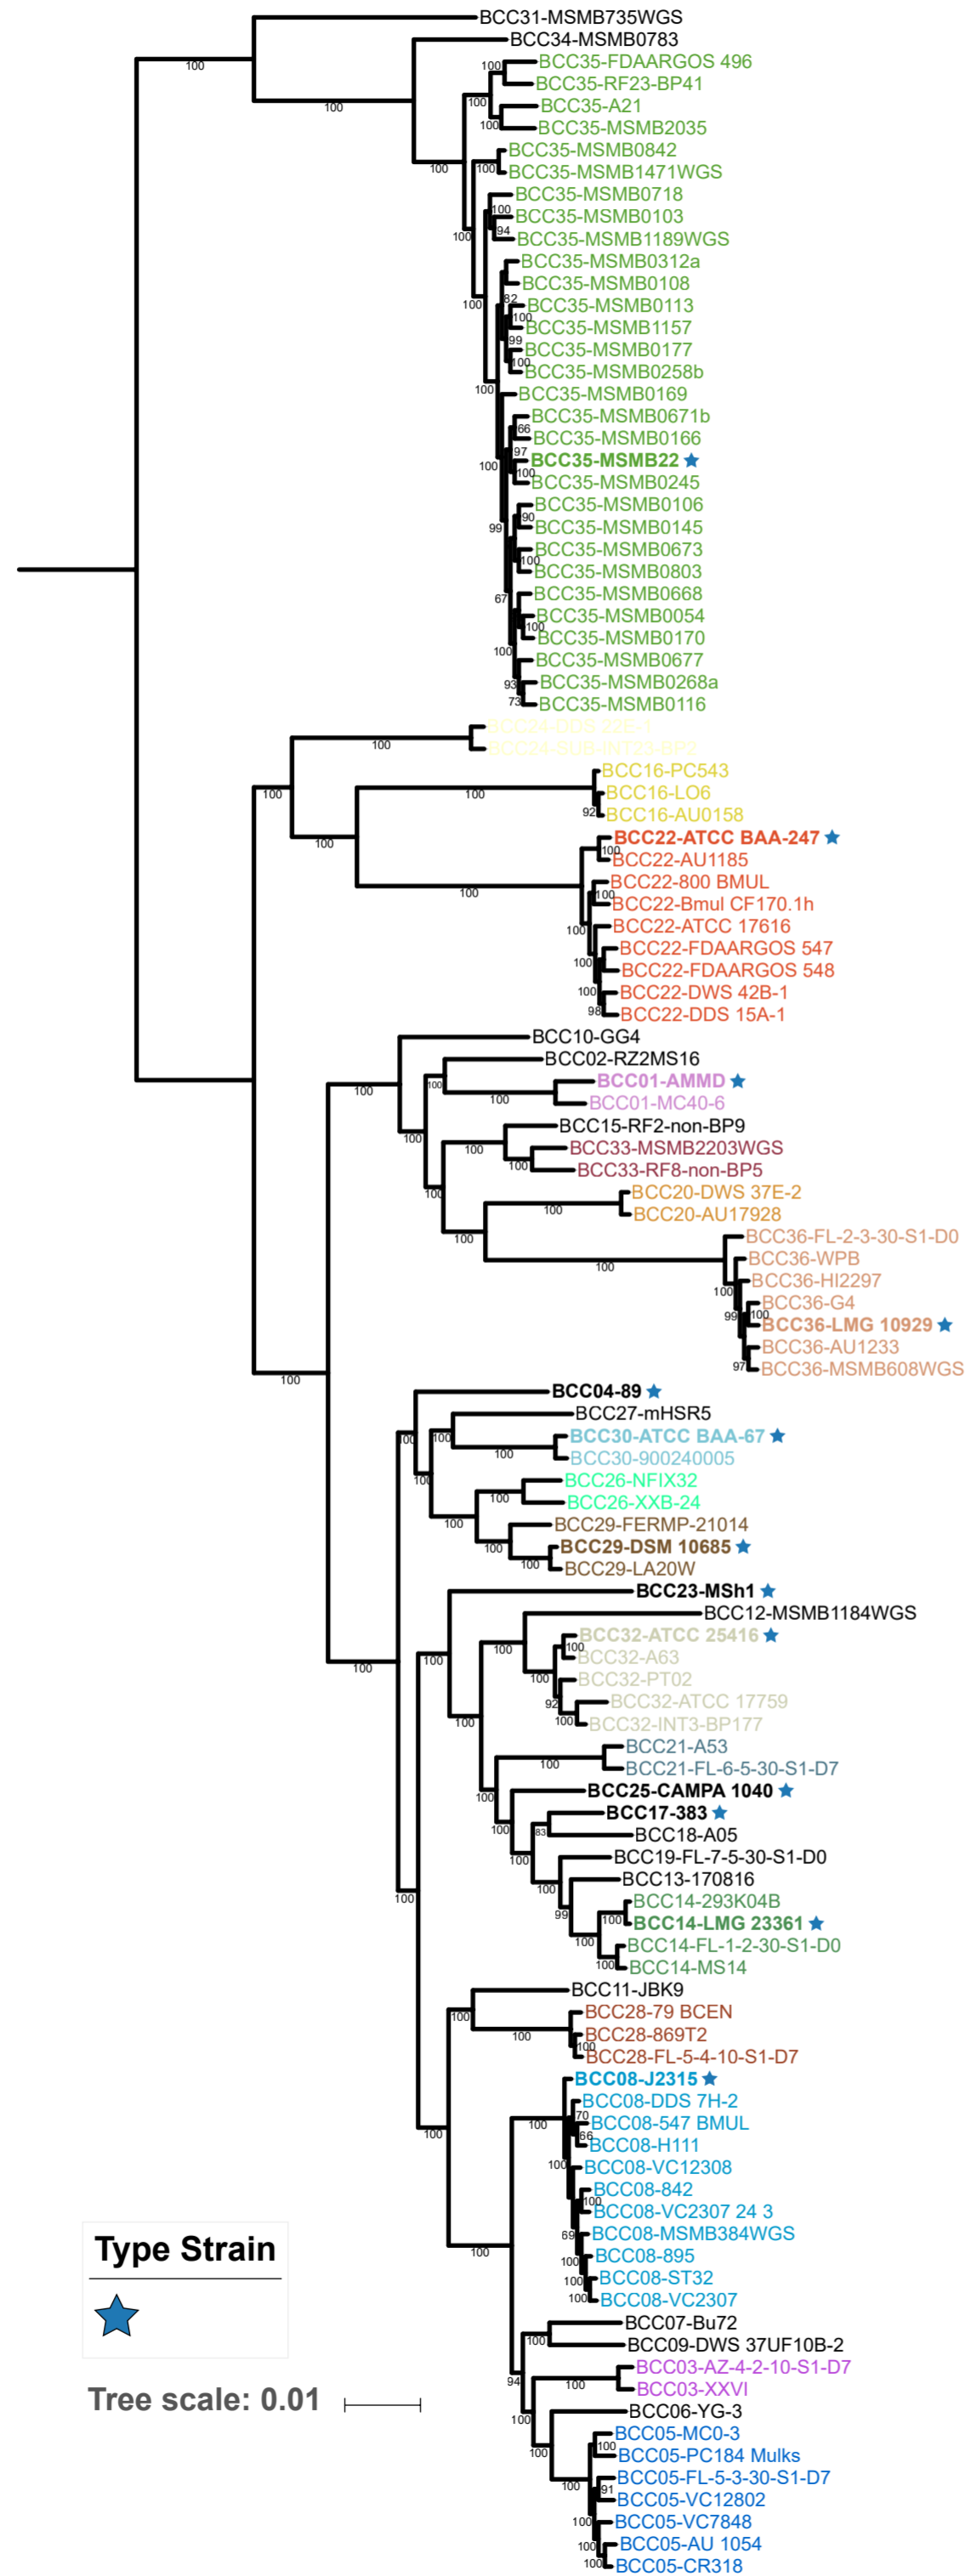

B

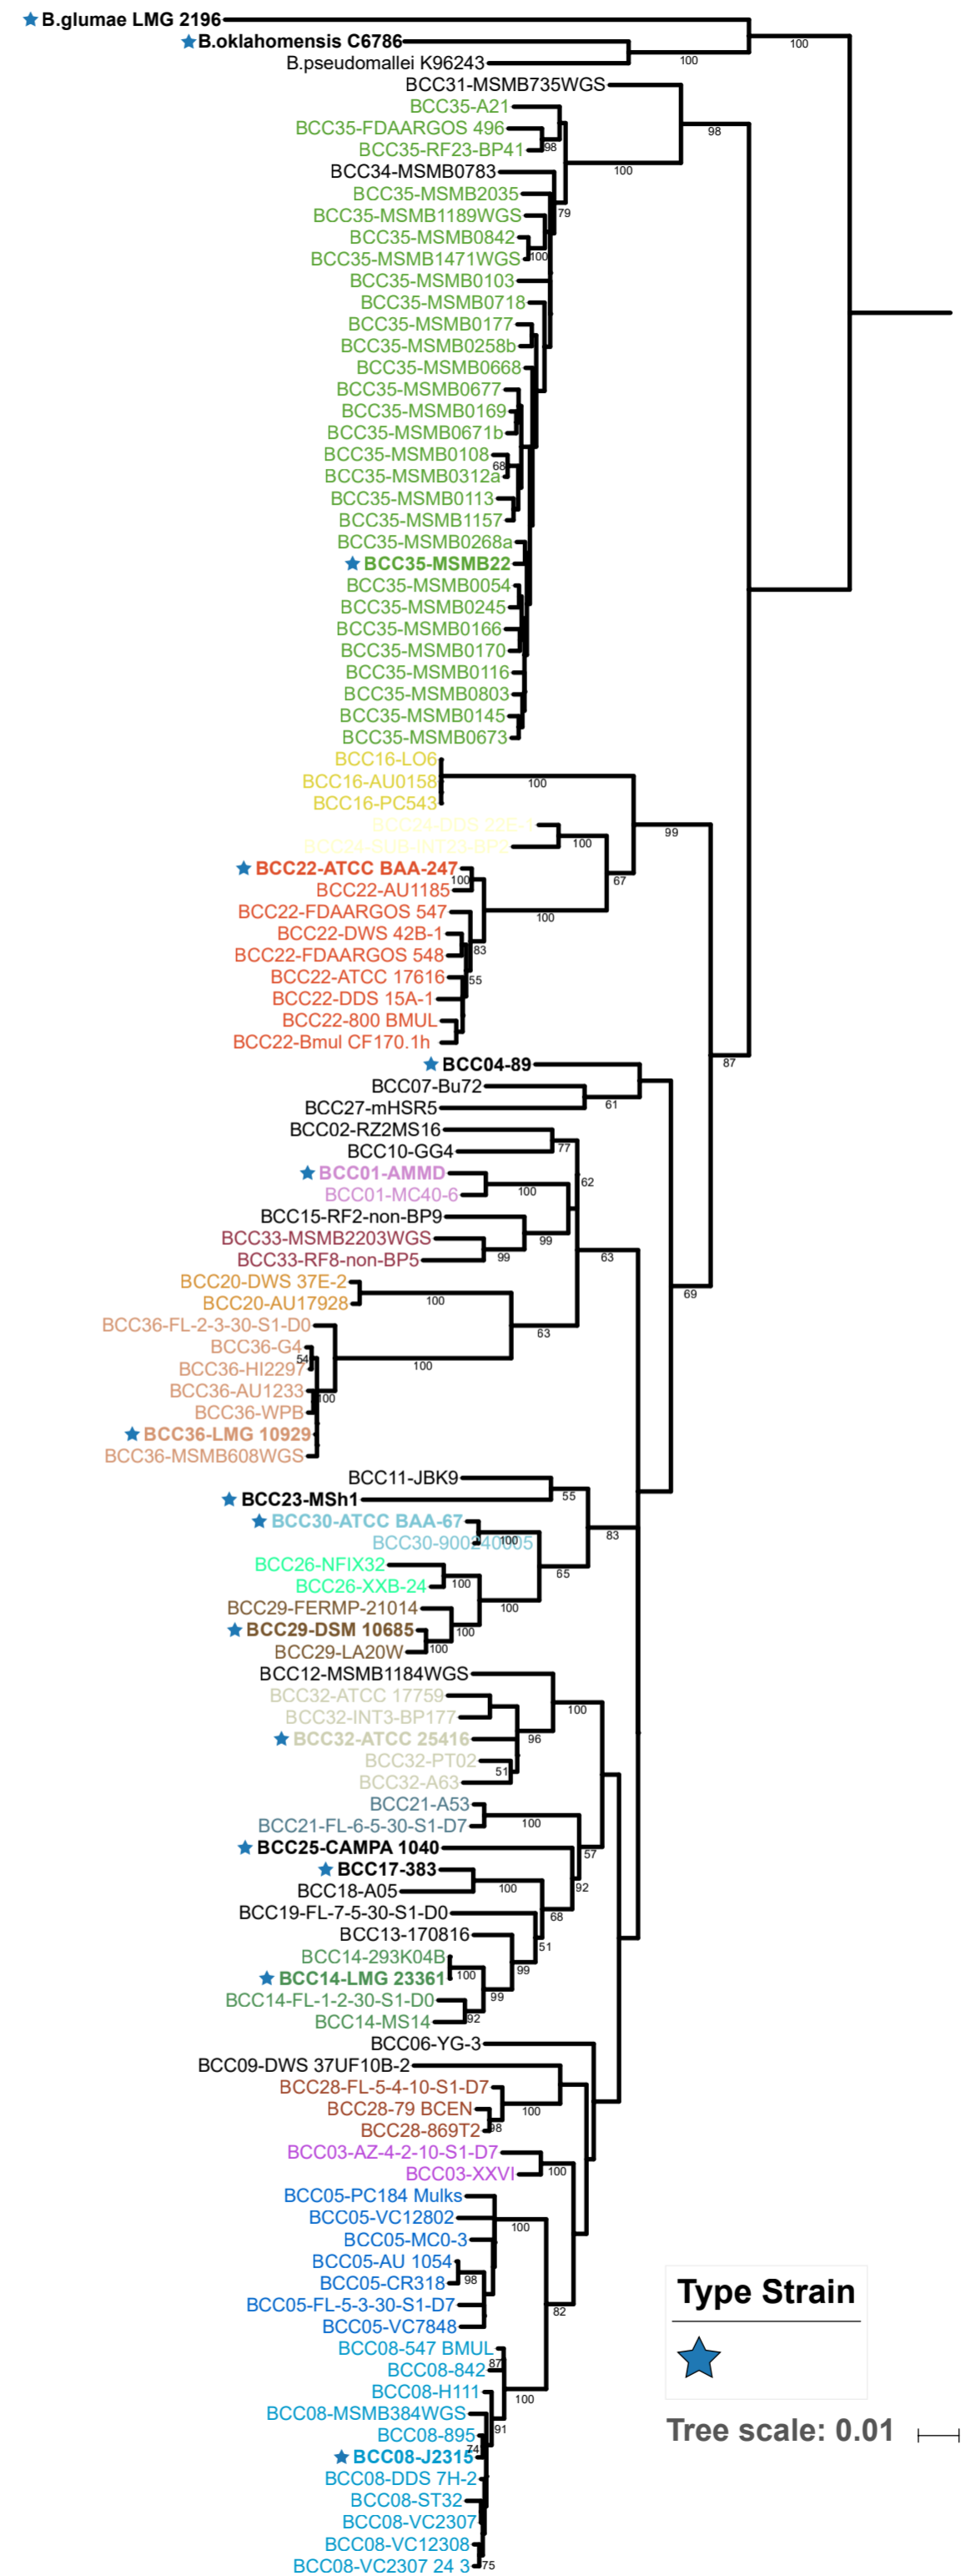

Supplement: 13062_2020_258_MOESM7_ESM.pdf [file 13062_2020_258_MOESM7_ESM.pdf]
