# Supplementary material for: Genome-based classification of Burkholderia cepacia complex provides new insight into its taxonomic status
Source: Biol Direct. 2020 Mar 4;15:6. doi: 10.1186/s13062-020-0258-5 (PMC7057466; doi:10.1186/s13062-020-0258-5)
Supplement: Supplementary file 1 — Additional file 1. Complete list of the 116 strains used in this study with detailed information. [file 13062_2020_258_MOESM1_ESM.xls]

## Sheet: Table_S1
Table Caption:
Complete list of 116 strains used in this study with detailed information
Strain	BCC	Proposed_species	NCBI_Species	Type_strain	organism_name	infraspecific_name	refseq_category	assembly_level	Genome size (bp)	G+C (%)	assembly_accession	Completeness	Contamination	Strain heterogeneity	Quality	relation_to_type_material	bioproject	GCA	Clustering_OPTSIL_i0.322_F0.5	Clustering_OPTSIL_i0.403_F0.5	Clustering_OPTSIL_i0.361_F0.5	ANI_D_Clustering_OPTSIL_i0.05_F0.5	ANI_D_Clustering_OPTSIL_i0.04_F0.5
BCC01-AMMD	BCC01	Burkholderia ambifaria	Burkholderia ambifaria	yes	Burkholderia ambifaria AMMD	strain=AMMD	na	Complete Genome	7528567	66.8	GCA_000203915.1	100	0	0	100	assembly from type material	PRJNA13490	000203915	01	01	01	02	02
BCC01-MC40-6	BCC01	Burkholderia ambifaria	Burkholderia ambifaria	no	Burkholderia ambifaria MC40-6	strain=MC40-6	na	Complete Genome	7642536	66.4	GCA_000019925.1	100	0	0	100		PRJNA17411	000019925	01	01	01	02	02
BCC02-RZ2MS16	BCC02	Burkholderia sp.	Burkholderia ambifaria	no	Burkholderia ambifaria	strain=RZ2MS16	na	Scaffold	8095900	65.7	GCA_001443045.1	100	0.45	0	97.75		PRJNA296767	001443045	02	02	02	08	09
BCC03-AZ-4-2-10-S1-D7	BCC03	Burkholderia anthina	Burkholderia anthina	no	Burkholderia anthina	strain=AZ-4-2-10-S1-D7	na	Chromosome	7273051	67.2	GCA_001547525.1	99.87	0.81	66.67	95.82		PRJNA279182	001547525	03	03	03	17	23
BCC03-XXVI	BCC03	Burkholderia anthina	Burkholderia anthina	no	Burkholderia anthina	strain=XXVI	na	Scaffold	7692989	67	GCA_002925705.1	99.87	0.74	60	96.17		PRJNA288828	002925705	03	03	03	17	23
BCC04-89	BCC04	Burkholderia catarinensis	Burkholderia catarinensis	yes	Burkholderia catarinensis	strain=89	na	Contig	8137374	66.5	GCA_001883705.1	95.75	1.73	0	87.1	assembly from type material	PRJNA338131	001883705	04	04	04	15	19
BCC05-AU 1054	BCC05	Burkholderia sp.	Burkholderia cenocepacia	no	Burkholderia cenocepacia AU 1054	strain=AU 1054	na	Complete Genome	7279116	66.9	GCA_000014085.1	99.97	0	0	99.97		PRJNA13919	000014085	05	05	05	20	25
BCC05-CR318	BCC05	Burkholderia sp.	Burkholderia cenocepacia	no	Burkholderia cenocepacia	strain=CR318	na	Complete Genome	7664894	66.8	GCA_002007585.1	100	0.54	0	97.3		PRJNA342374	002007585	05	05	05	20	25
BCC05-FL-5-3-30-S1-D7	BCC05	Burkholderia sp.	Burkholderia cenocepacia	no	Burkholderia cenocepacia	strain=FL-5-3-30-S1-D7	na	Complete Genome	6330751	67.1	GCA_001718515.1	100	0	0	100		PRJNA279182	001718515	05	05	05	20	25
BCC05-MC0-3	BCC05	Burkholderia sp.	Burkholderia cenocepacia	no	Burkholderia cenocepacia MC0-3	strain=MC0-3	na	Complete Genome	7971389	66.6	GCA_000019505.1	100	0	0	100		PRJNA17929	000019505	05	05	05	20	25
BCC05-PC184 Mulks	BCC05	Burkholderia sp.	Burkholderia cenocepacia	no	Burkholderia cenocepacia	strain=PC184 Mulks	na	Complete Genome	7067048	66.9	GCA_003076415.1	99.06	0.2	100	98.06		PRJNA384579	003076415	05	05	05	20	25
BCC05-VC12802	BCC05	Burkholderia sp.	Burkholderia cenocepacia	no	Burkholderia cenocepacia	strain=VC12802	na	Complete Genome	7394909	67.1	GCA_001999825.1	100	0	0	100		PRJNA289138	001999825	05	05	05	20	25
BCC05-VC7848	BCC05	Burkholderia sp.	Burkholderia cenocepacia	no	Burkholderia cenocepacia	strain=VC7848	na	Complete Genome	7499459	66.9	GCA_001999785.1	100	0.34	0	98.3		PRJNA289138	001999785	05	05	05	20	25
BCC06-YG-3	BCC06	Burkholderia sp.	Burkholderia cenocepacia	no	Burkholderia cenocepacia	strain=YG-3	na	Complete Genome	8036463	66.8	GCA_003966315.1	99.87	1.07	16.67	94.52		PRJNA491642	003966315	06	06	06	26	33
BCC07-Bu72	BCC07	Burkholderia sp.	Burkholderia cepacia	no	Burkholderia cepacia Bu72	strain=Bu72	na	Scaffold	7423806	66.9	GCA_000504665.1	99.87	0.13	0	99.22		PRJNA61371	000504665	07	07	07	06	04
BCC08-547 BMUL	BCC08	Burkholderia cenocepacia	Burkholderia cenocepacia	no	Burkholderia cenocepacia	strain=547_BMUL	na	Scaffold	8075472	66.8	GCA_001055325.1	98.42	0.81	0	94.37		PRJNA267549	001055325	08	08	08	20	27
BCC08-842	BCC08	Burkholderia cenocepacia	Burkholderia cenocepacia	no	Burkholderia cenocepacia	strain=842	na	Complete Genome	8149696	66.9	GCA_001606115.1	99.87	0.6	0	96.87		PRJNA315790	001606115	08	08	08	20	27
BCC08-895	BCC08	Burkholderia cenocepacia	Burkholderia cenocepacia	no	Burkholderia cenocepacia	strain=895	na	Complete Genome	8731481	66.8	GCA_001606135.1	99.6	0.3	0	98.1		PRJNA316047	001606135	08	08	08	20	27
BCC08-DDS 7H-2	BCC08	Burkholderia cenocepacia	Burkholderia cepacia	no	Burkholderia cepacia	strain=DDS 7H-2	na	Complete Genome	8147114	67.1	GCA_000755805.1	99.87	0.66	0	96.57		PRJNA244017	000755805	08	08	08	20	27
BCC08-H111	BCC08	Burkholderia cenocepacia	Burkholderia cenocepacia	no	Burkholderia cenocepacia H111	strain=H111	na	Complete Genome	7714893	67.3	GCA_000236215.4	99.65	0	0	99.65		PRJNA69823	000236215	08	08	08	20	27
BCC08-J2315	BCC08	Burkholderia cenocepacia	Burkholderia cenocepacia	yes	Burkholderia cenocepacia J2315	strain=J2315	na	Complete Genome	8055782	66.9	GCA_000009485.1	99.87	1.66	93.75	91.57		PRJNA339	000009485	08	08	08	20	27
BCC08-MSMB384WGS	BCC08	Burkholderia cenocepacia	Burkholderia cenocepacia	no	Burkholderia cenocepacia	strain=MSMB384WGS	na	Complete Genome	7780598	67.3	GCA_001718895.1	99.87	0.2	0	98.87		PRJNA279182	001718895	08	08	08	20	27
BCC08-ST32	BCC08	Burkholderia cenocepacia	Burkholderia cenocepacia	no	Burkholderia cenocepacia	strain=ST32	na	Complete Genome	8090388	67	GCA_001484665.1	99.87	0.34	0	98.17		PRJNA274219	001484665	08	08	08	20	27
BCC08-VC12308	BCC08	Burkholderia cenocepacia	Burkholderia cenocepacia	no	Burkholderia cenocepacia	strain=VC12308	na	Complete Genome	7634498	67.2	GCA_001999885.1	99.87	0.2	0	98.87		PRJNA289138	001999885	08	08	08	20	27
BCC08-VC2307	BCC08	Burkholderia cenocepacia	Burkholderia cenocepacia	no	Burkholderia cenocepacia	strain=VC2307	na	Chromosome	7915879	66.9	GCA_001999805.1	99.46	0.81	40	95.41		PRJNA289138	001999805	08	08	08	20	27
BCC08-VC2307 24 3	BCC08	Burkholderia cenocepacia	Burkholderia cenocepacia	no	Burkholderia cenocepacia	strain=VC2307 24_3	na	Scaffold	7953643	67.1	GCA_003269225.1	99.87	0.2	0	98.87		PRJNA463430	003269225	08	08	08	20	27
BCC09-DWS 37UF10B-2	BCC09	Burkholderia sp.	Burkholderia cepacia	no	Burkholderia cepacia	strain=DWS 37UF10B-2	na	Scaffold	7182132	67.2	GCA_000756845.1	99.87	0.87	20	95.52		PRJNA244018	000756845	09	09	09	06	07
BCC10-GG4	BCC10	Burkholderia sp.	Burkholderia cepacia	no	Burkholderia cepacia GG4	strain=GG4	na	Complete Genome	6467321	66.7	GCA_000292915.1	99.9	0.6	0	96.9		PRJNA66091	000292915	10	10	10	03	03
BCC11-JBK9	BCC11	Burkholderia sp.	Burkholderia cepacia	no	Burkholderia cepacia JBK9	strain=JBK9	na	Complete Genome	8481212	66.8	GCA_000701165.2	100	1.22	60	93.9		PRJNA217842	000701165	11	11	11	04	05
BCC12-MSMB1184WGS	BCC12	Burkholderia sp.	Burkholderia cepacia	no	Burkholderia cepacia	strain=MSMB1184WGS	na	Complete Genome	8003631	66.4	GCA_001718835.1	99.76	1.24	0	93.56		PRJNA279182	001718835	12	12	12	13	17
BCC13-170816	BCC13	Burkholderia sp.	Burkholderia contaminans	no	Burkholderia contaminans	strain=170816	na	Chromosome	8628791	66.5	GCA_002924455.1	100	0.74	25	96.3		PRJNA429933	002924455	13	13	13	22	22
BCC14-293K04B	BCC14	Burkholderia contaminans	Burkholderia contaminans	no	Burkholderia contaminans	strain=293K04B	na	Scaffold	8833884	66.2	GCA_002270525.1	99.96	0.28	0	98.56		PRJNA397968	002270525	14	14	14	22	29
BCC14-FL-1-2-30-S1-D0	BCC14	Burkholderia contaminans	Burkholderia contaminans	no	Burkholderia contaminans	strain=FL-1-2-30-S1-D0	na	Complete Genome	8170775	66.5	GCA_003704285.1	100	0.48	0	97.6		PRJNA279182	003704285	14	14	14	22	29
BCC14-LMG 23361	BCC14	Burkholderia contaminans	Burkholderia contaminans	yes	Burkholderia contaminans	strain=LMG 23361	na	Contig	10352616	65.7	GCA_001758385.2	100	5.83	86.49	70.85	assembly from type material	PRJNA335409	001758385	14	14	14	22	29
BCC14-MS14	BCC14	Burkholderia contaminans	Burkholderia contaminans	no	Burkholderia contaminans	strain=MS14	na	Complete Genome	8509249	66.4	GCA_001029145.1	100	0.48	0	97.6		PRJNA263944	001029145	14	14	14	22	29
BCC15-RF2-non-BP9	BCC15	Burkholderia diffusa	Burkholderia diffusa	no	Burkholderia diffusa	strain=RF2-non-BP9	na	Complete Genome	6857833	66.5	GCA_001718315.1	100	0.05	0	99.75		PRJNA279182	001718315	15	15	15	09	10
BCC16-AU0158	BCC16	Burkholderia dolosa	Burkholderia dolosa	no	Burkholderia dolosa AU0158	strain=AU0158	na	Complete Genome	6409095	67	GCA_000959505.1	99.6	0.13	0	98.95		PRJNA235220	000959505	16	16	16	07	08
BCC16-LO6	BCC16	Burkholderia dolosa	Burkholderia cepacia	no	Burkholderia cepacia	strain=LO6	na	Complete Genome	6419376	67	GCA_000974835.2	99.6	0.13	0	98.95		PRJNA281467	000974835	16	16	16	07	08
BCC16-PC543	BCC16	Burkholderia dolosa	Burkholderia dolosa	no	Burkholderia dolosa PC543	strain=PC543	na	Chromosome	6297968	67.1	GCA_000497165.1	98.99	0.13	0	98.34		PRJNA214965	000497165	16	16	16	07	08
BCC17-383	BCC17	Burkholderia lata	Burkholderia lata	yes	Burkholderia lata	strain=383	na	Complete Genome	8676277	66.3	GCA_000012945.1	100	0.08	0	99.6	assembly from type material	PRJNA10695	000012945	17	17	17	01	01
BCC18-A05	BCC18	Burkholderia sp.	Burkholderia lata	no	Burkholderia lata	strain=A05	na	Complete Genome	8787009	66.2	GCA_003711145.1	100	1.58	0	92.1		PRJNA419071	003711145	18	18	18	23	30
BCC19-FL-7-5-30-S1-D0	BCC19	Burkholderia sp.	Burkholderia lata	no	Burkholderia lata	strain=FL-7-5-30-S1-D0	na	Complete Genome	8354839	66.5	GCA_001718575.1	100	1.2	0	94		PRJNA279182	001718575	19	19	19	22	14
BCC20-AU17928	BCC20	Burkholderia latens	Burkholderia latens	no	Burkholderia latens	strain=AU17928	na	Complete Genome	6614478	66.4	GCA_001718795.1	100	0.4	0	98		PRJNA279182	001718795	20	20	20	12	16
BCC20-DWS 37E-2	BCC20	Burkholderia latens	Burkholderia cenocepacia	no	Burkholderia cenocepacia	strain=DWS 37E-2	na	Complete Genome	6612421	66.5	GCA_000764955.1	100	0.4	0	98		PRJNA244015	000764955	20	20	20	12	16
BCC21-A53	BCC21	Burkholderia metallica	Burkholderia metallica	no	Burkholderia metallica	strain=A53	na	Scaffold	8233033	66.6	GCA_003034145.1	99.96	0.54	33.33	97.26		PRJNA369256	003034145	21	21	21	18	24
BCC21-FL-6-5-30-S1-D7	BCC21	Burkholderia metallica	Burkholderia metallica	no	Burkholderia metallica	strain=FL-6-5-30-S1-D7	na	Complete Genome	7424240	67.1	GCA_001718555.1	100	0.4	100	98		PRJNA279182	001718555	21	21	21	18	24
BCC22-800 BMUL	BCC22	Burkholderia multivorans	Burkholderia multivorans	no	Burkholderia multivorans	strain=800_BMUL	na	Scaffold	6648737	67	GCA_001058485.1	99.21	0.67	40	95.86		PRJNA267549	001058485	22	22	22	24	31
BCC22-ATCC 17616	BCC22	Burkholderia multivorans	Burkholderia multivorans	no	Burkholderia multivorans ATCC 17616	strain=ATCC 17616	na	Complete Genome	7008810	66.7	GCA_000010545.1	100	0	0	100		PRJDA19401	000010545	22	22	22	24	31
BCC22-ATCC BAA-247	BCC22	Burkholderia multivorans	Burkholderia multivorans	yes	Burkholderia multivorans ATCC BAA-247	strain=ATCC BAA-247	na	Complete Genome	6322746	67.2	GCA_000959525.1	100	0.08	0	99.6	assembly from type material	PRJNA264318	000959525	22	22	22	24	31
BCC22-AU1185	BCC22	Burkholderia multivorans	Burkholderia multivorans	no	Burkholderia multivorans	strain=AU1185	na	Complete Genome	6620936	66.9	GCA_001718755.1	99.9	0	0	99.9		PRJNA279182	001718755	22	22	22	24	31
BCC22-Bmul CF170.1h	BCC22	Burkholderia multivorans	Burkholderia multivorans	no	Burkholderia multivorans	strain=Bmul_CF170.1h	na	Scaffold	6406535	67	GCA_003255935.1	99.96	0.4	0	97.96		PRJNA475602	003255935	22	22	22	24	31
BCC22-DDS 15A-1	BCC22	Burkholderia multivorans	Burkholderia multivorans	no	Burkholderia multivorans	strain=DDS 15A-1	na	Complete Genome	7281867	66.6	GCA_000756005.1	100	0.05	0	99.75		PRJNA244058	000756005	22	22	22	24	31
BCC22-DWS 42B-1	BCC22	Burkholderia multivorans	Burkholderia multivorans	no	Burkholderia multivorans	strain=DWS 42B-1	na	Scaffold	6505301	67.3	GCA_000756965.1	100	0	0	100		PRJNA244059	000756965	22	22	22	24	31
BCC22-FDAARGOS 547	BCC22	Burkholderia multivorans	Burkholderia multivorans	no	Burkholderia multivorans	strain=FDAARGOS_547	na	Complete Genome	6394083	67.3	GCA_003812365.1	100	0	0	100		PRJNA231221	003812365	22	22	22	24	31
BCC22-FDAARGOS 548	BCC22	Burkholderia multivorans	Burkholderia multivorans	no	Burkholderia multivorans	strain=FDAARGOS_548	na	Complete Genome	6653864	67	GCA_003812585.1	100	0.18	0	99.1		PRJNA231221	003812585	22	22	22	24	31
BCC23-MSh1	BCC23	Burkholderia paludis	Burkholderia paludis	yes	Burkholderia paludis	strain=MSh1	na	Contig	8633651	67.1	GCA_000732615.1	100	2.2	0	89	assembly from type material	PRJNA251788	000732615	23	23	23	05	06
BCC24-DDS 22E-1	BCC24	Burkholderia pseudomultivorans	Burkholderia cenocepacia	no	Burkholderia cenocepacia	strain=DDS 22E-1	na	Complete Genome	8045250	67	GCA_000755725.1	100	0.91	0	95.45		PRJNA244014	000755725	24	24	24	10	12
BCC24-SUB-INT23-BP2	BCC24	Burkholderia pseudomultivorans	Burkholderia pseudomultivorans	no	Burkholderia pseudomultivorans	strain=SUB-INT23-BP2	na	Complete Genome	7956789	67.3	GCA_001718415.1	100	0.5	0	97.5		PRJNA279182	001718415	24	24	24	10	12
BCC25-CAMPA 1040	BCC25	Burkholderia puraquae	Burkholderia puraquae	yes	Burkholderia puraquae	strain=CAMPA 1040	na	Contig	8098134	66.6	GCA_002099195.1	100	0.2	0	99	assembly from type material	PRJNA381363	002099195	25	25	25	16	20
BCC26-NFIX32	BCC26	Burkholderia sp.	Burkholderia pyrrocinia	no	Burkholderia pyrrocinia	strain=NFIX32	na	Scaffold	7964495	66.2	GCA_003201755.1	100	0.2	0	99		PRJNA263063	003201755	26	26	26	27	34
BCC26-XXB-24	BCC26	Burkholderia sp.	Burkholderia pyrrocinia	no	Burkholderia pyrrocinia	strain=XXB-24	na	Scaffold	7907161	66.5	GCA_004347225.1	99.47	0.64	25	96.27		PRJNA518004	004347225	27	26	27	27	34
BCC27-mHSR5	BCC27	Burkholderia sp.	Burkholderia pyrrocinia	no	Burkholderia pyrrocinia	strain=mHSR5	na	Complete Genome	8004399	66.3	GCA_003330765.1	99.97	0.6	0	96.97		PRJNA417370	003330765	28	27	28	21	28
BCC28-79 BCEN	BCC28	Burkholderia seminalis	Burkholderia cenocepacia	no	Burkholderia cenocepacia	strain=79_BCEN	na	Scaffold	7851564	66.8	GCA_001058445.1	96.14	2.81	9.09	82.09		PRJNA267549	001058445	29	28	29	11	13
BCC28-869T2	BCC28	Burkholderia seminalis	Burkholderia cenocepacia	no	Burkholderia cenocepacia	strain=869T2	na	Scaffold	7979184	67.1	GCA_000705535.1	100	0.03	0	99.85		PRJNA243842	000705535	29	28	29	11	13
BCC28-FL-5-4-10-S1-D7	BCC28	Burkholderia seminalis	Burkholderia seminalis	no	Burkholderia seminalis	strain=FL-5-4-10-S1-D7	na	Complete Genome	7648944	67.3	GCA_001718535.1	100	0	0	100		PRJNA279182	001718535	29	28	29	11	13
BCC29-FERMP-21014	BCC29	Burkholderia pyrrocinia	Burkholderia stabilis	no	Burkholderia stabilis	strain=FERMP-21014	na	Complete Genome	7721104	66.7	GCA_002356275.1	100	0.6	0	97		PRJDB5640	002356275	30	29	30	27	21
BCC29-DSM 10685	BCC29	Burkholderia pyrrocinia	Burkholderia pyrrocinia	yes	Burkholderia pyrrocinia	strain=DSM 10685	na	Complete Genome	7961346	66.5	GCA_001028665.1	100	1.52	66.67	92.4	assembly from type material	PRJNA283474	001028665	31	29	31	27	21
BCC29-LA20W	BCC29	Burkholderia pyrrocinia	Burkholderia stabilis	no	Burkholderia stabilis	strain=LA20W	na	Scaffold	7968936	66.5	GCA_001685505.1	100	1.02	20	94.9		PRJDB4654	001685505	31	29	31	27	21
BCC30-ATCC BAA-67	BCC30	Burkholderia stabilis	Burkholderia stabilis	yes	Burkholderia stabilis	strain=ATCC BAA-67	na	Complete Genome	8527947	66.4	GCA_001742165.1	99.87	0.54	0	97.17	assembly from type material	PRJNA328254	001742165	32	30	32	29	36
BCC30-900240005	BCC30	Burkholderia stabilis	Burkholderia stabilis	no	Burkholderia stabilis		na	Chromosome	8505509	66.3	GCA_900240005.1	100	0.6	0	97		PRJEB18658	900240005	32	30	32	29	36
BCC31-MSMB735WGS	BCC31	Burkholderia stagnalis	Burkholderia stagnalis	no	Burkholderia stagnalis	strain=MSMB735WGS	na	Complete Genome	7583807	67.7	GCA_001718955.1	100	1.21	0	93.95		PRJNA279182	001718955	33	31	33	14	18
BCC32-A63	BCC32	Burkholderia cepacia	Burkholderia territorii	no	Burkholderia territorii	strain=A63	na	Scaffold	8865752	66.4	GCA_002151255.1	99.92	1.07	0	94.57		PRJNA369256	002151255	34	32	34	19	26
BCC32-ATCC 17759	BCC32	Burkholderia cepacia	Burkholderia cepacia	no	Burkholderia cepacia	strain=ATCC 17759	na	Scaffold	8721279	66.7	GCA_002906895.1	98.21	0.43	33.33	96.06		PRJNA415491	002906895	34	32	34	19	26
BCC32-ATCC 25416	BCC32	Burkholderia cepacia	Burkholderia cepacia	yes	Burkholderia cepacia ATCC 25416	strain=ATCC 25416	representative genome	Complete Genome	8605945	66.6	GCA_001411495.1	100	0.74	66.67	96.3	assembly from type material	PRJNA298860	001411495	34	32	34	19	26
BCC32-INT3-BP177	BCC32	Burkholderia cepacia	Burkholderia cepacia	no	Burkholderia cepacia	strain=INT3-BP177	na	Complete Genome	7337382	66.8	GCA_001718395.1	100	0.4	0	98		PRJNA279182	001718395	34	32	34	19	26
BCC32-PT02	BCC32	Burkholderia cepacia	Burkholderia cepacia	no	Burkholderia cepacia	strain=PT02	na	Scaffold	8439210	66.9	GCA_003268125.1	100	0.81	0	95.95		PRJNA477262	003268125	34	32	34	19	26
BCC33-MSMB2203WGS	BCC33	Burkholderia territorii	Burkholderia territorii	no	Burkholderia territorii	strain=MSMB2203WGS	na	Chromosome	6883104	66.5	GCA_001636095.1	100	0.4	0	98		PRJNA279182	001636095	35	33	35	09	11
BCC33-RF8-non-BP5	BCC33	Burkholderia territorii	Burkholderia territorii	no	Burkholderia territorii	strain=RF8-non-BP5	na	Complete Genome	6902370	66.7	GCA_001718335.1	100	0.4	0	98		PRJNA279182	001718335	36	33	35	09	11
BCC34-MSMB0783	BCC34	Burkholderia sp.	Burkholderia ubonensis	no	Burkholderia ubonensis	strain=MSMB0783	na	Complete Genome	6684845	67.3	GCA_001718695.1	99.76	1.05	85.71	94.51		PRJNA279182	001718695	37	34	36	25	15
BCC35-A21	BCC35	Burkholderia ubonensis	Burkholderia ubonensis	no	Burkholderia ubonensis	strain=A21	na	Scaffold	7013092	67.3	GCA_001957105.1	100	1.73	20	91.35		PRJNA340345	001957105	39	35	37	25	32
BCC35-FDAARGOS 496	BCC35	Burkholderia ubonensis	Burkholderia multivorans	no	Burkholderia multivorans	strain=FDAARGOS_496	na	Complete Genome	7796416	67.3	GCA_003812965.1	100	1.61	0	91.95		PRJNA231221	003812965	39	35	37	25	32
BCC35-MSMB0054	BCC35	Burkholderia ubonensis	Burkholderia ubonensis	no	Burkholderia ubonensis	strain=MSMB0054	na	Scaffold	7376717	67.2	GCA_001882595.1	100	2.17	11.11	89.15		PRJNA340345	001882595	38	35	37	25	32
BCC35-MSMB0103	BCC35	Burkholderia ubonensis	Burkholderia ubonensis	no	Burkholderia ubonensis	strain=MSMB0103	na	Scaffold	7518894	67.2	GCA_001882395.1	100	1.49	12.5	92.55		PRJNA340345	001882395	38	35	37	25	32
BCC35-MSMB0106	BCC35	Burkholderia ubonensis	Burkholderia ubonensis	no	Burkholderia ubonensis	strain=MSMB0106	na	Scaffold	7088690	67.2	GCA_001882645.1	96.13	2.17	20	85.28		PRJNA340345	001882645	38	35	37	25	32
BCC35-MSMB0108	BCC35	Burkholderia ubonensis	Burkholderia ubonensis	no	Burkholderia ubonensis	strain=MSMB0108	na	Scaffold	7664171	67	GCA_001882385.1	98.53	1.59	12.5	90.58		PRJNA340345	001882385	38	35	37	25	32
BCC35-MSMB0113	BCC35	Burkholderia ubonensis	Burkholderia ubonensis	no	Burkholderia ubonensis	strain=MSMB0113	na	Scaffold	7205841	67.3	GCA_001882635.1	99.66	1.79	12.5	90.71		PRJNA340345	001882635	38	35	37	25	32
BCC35-MSMB0116	BCC35	Burkholderia ubonensis	Burkholderia ubonensis	no	Burkholderia ubonensis	strain=MSMB0116	na	Scaffold	7373615	67.3	GCA_001882425.1	100	1.56	0	92.2		PRJNA340345	001882425	38	35	37	25	32
BCC35-MSMB0145	BCC35	Burkholderia ubonensis	Burkholderia ubonensis	no	Burkholderia ubonensis	strain=MSMB0145	na	Scaffold	7347359	67	GCA_001882705.1	98.19	1.74	11.11	89.49		PRJNA340345	001882705	38	35	37	25	32
BCC35-MSMB0166	BCC35	Burkholderia ubonensis	Burkholderia ubonensis	no	Burkholderia ubonensis	strain=MSMB0166	na	Scaffold	7101117	67.3	GCA_001882745.1	99.4	1.56	14.29	91.6		PRJNA340345	001882745	38	35	37	25	32
BCC35-MSMB0169	BCC35	Burkholderia ubonensis	Burkholderia ubonensis	no	Burkholderia ubonensis	strain=MSMB0169	na	Scaffold	7337652	66.8	GCA_001882755.1	96.44	1.46	16.67	89.14		PRJNA340345	001882755	38	35	37	25	32
BCC35-MSMB0170	BCC35	Burkholderia ubonensis	Burkholderia ubonensis	no	Burkholderia ubonensis	strain=MSMB0170	na	Scaffold	7358127	67.3	GCA_001882435.1	100	1.56	0	92.2		PRJNA340345	001882435	38	35	37	25	32
BCC35-MSMB0177	BCC35	Burkholderia ubonensis	Burkholderia ubonensis	no	Burkholderia ubonensis	strain=MSMB0177	na	Scaffold	7265450	67.4	GCA_001882785.1	99.21	2.02	0	89.11		PRJNA340345	001882785	38	35	37	25	32
BCC35-MSMB0245	BCC35	Burkholderia ubonensis	Burkholderia ubonensis	no	Burkholderia ubonensis	strain=MSMB0245	na	Scaffold	7261205	67.3	GCA_001882475.1	99.89	1.76	0	91.09		PRJNA340345	001882475	38	35	37	25	32
BCC35-MSMB0258b	BCC35	Burkholderia ubonensis	Burkholderia ubonensis	no	Burkholderia ubonensis	strain=MSMB0258b	na	Scaffold	7535180	67.2	GCA_001882505.1	100	1.81	0	90.95		PRJNA340345	001882505	38	35	37	25	32
BCC35-MSMB0268a	BCC35	Burkholderia ubonensis	Burkholderia ubonensis	no	Burkholderia ubonensis	strain=MSMB0268a	na	Scaffold	7646313	67	GCA_001882515.1	100	1.74	0	91.3		PRJNA340345	001882515	38	35	37	25	32
BCC35-MSMB0312a	BCC35	Burkholderia ubonensis	Burkholderia ubonensis	no	Burkholderia ubonensis	strain=MSMB0312a	na	Scaffold	6458263	67.3	GCA_001882795.1	100	1.11	0	94.45		PRJNA340345	001882795	38	35	37	25	32
BCC35-MSMB0668	BCC35	Burkholderia ubonensis	Burkholderia ubonensis	no	Burkholderia ubonensis	strain=MSMB0668	na	Scaffold	6601965	67.2	GCA_001882545.1	100	1.31	0	93.45		PRJNA340345	001882545	38	35	37	25	32
BCC35-MSMB0671b	BCC35	Burkholderia ubonensis	Burkholderia ubonensis	no	Burkholderia ubonensis	strain=MSMB0671b	na	Scaffold	7202158	67.4	GCA_001882825.1	99.6	1.56	0	91.8		PRJNA340345	001882825	38	35	37	25	32
BCC35-MSMB0673	BCC35	Burkholderia ubonensis	Burkholderia ubonensis	no	Burkholderia ubonensis	strain=MSMB0673	na	Scaffold	7262156	67.4	GCA_001882845.1	100	1.97	0	90.15		PRJNA340345	001882845	38	35	37	25	32
BCC35-MSMB0677	BCC35	Burkholderia ubonensis	Burkholderia ubonensis	no	Burkholderia ubonensis	strain=MSMB0677	na	Scaffold	7549796	67.1	GCA_001882555.1	100	1.7	12.5	91.5		PRJNA340345	001882555	38	35	37	25	32
BCC35-MSMB0718	BCC35	Burkholderia ubonensis	Burkholderia ubonensis	no	Burkholderia ubonensis	strain=MSMB0718	na	Scaffold	7567861	67.3	GCA_001722245.1	100	1.66	0	91.7		PRJNA340345	001722245	38	35	37	25	32
BCC35-MSMB0803	BCC35	Burkholderia ubonensis	Burkholderia ubonensis	no	Burkholderia ubonensis	strain=MSMB0803	na	Scaffold	7126267	67.5	GCA_001722225.1	100	1.56	0	92.2		PRJNA340345	001722225	38	35	37	25	32
BCC35-MSMB0842	BCC35	Burkholderia ubonensis	Burkholderia ubonensis	no	Burkholderia ubonensis	strain=MSMB0842	na	Scaffold	7606975	67.2	GCA_001722235.1	100	1.82	0	90.9		PRJNA340345	001722235	38	35	37	25	32
BCC35-MSMB1157	BCC35	Burkholderia ubonensis	Burkholderia ubonensis	no	Burkholderia ubonensis	strain=MSMB1157	na	Chromosome	8000752	67	GCA_001546975.1	100	1.71	0	91.45		PRJNA279182	001546975	38	35	37	25	32
BCC35-MSMB1189WGS	BCC35	Burkholderia ubonensis	Burkholderia ubonensis	no	Burkholderia ubonensis	strain=MSMB1189WGS	na	Complete Genome	8028759	66.8	GCA_001718855.1	100	1.24	0	93.8		PRJNA279182	001718855	38	35	37	25	32
BCC35-MSMB1471WGS	BCC35	Burkholderia ubonensis	Burkholderia ubonensis	no	Burkholderia ubonensis	strain=MSMB1471WGS	na	Complete Genome	7463411	67.4	GCA_001718975.1	100	1.92	0	90.4		PRJNA279182	001718975	38	35	37	25	32
BCC35-MSMB2035	BCC35	Burkholderia ubonensis	Burkholderia ubonensis	no	Burkholderia ubonensis	strain=MSMB2035	na	Complete Genome	7235060	66.8	GCA_001718655.1	100	1.46	0	92.7		PRJNA279182	001718655	39	35	37	25	32
BCC35-MSMB22	BCC35	Burkholderia ubonensis	Burkholderia ubonensis	yes	Burkholderia ubonensis MSMB22	strain=MSMB22	representative genome	Complete Genome	7189071	67.3	GCA_000959245.1	100	1.61	0	91.95		PRJNA239258	000959245	38	35	37	25	32
BCC35-RF23-BP41	BCC35	Burkholderia ubonensis	Burkholderia ubonensis	no	Burkholderia ubonensis	strain=RF23-BP41	na	Complete Genome	7961598	67.1	GCA_001718355.1	100	1.41	0	92.95		PRJNA279182	001718355	39	35	37	25	32
BCC36-AU1233	BCC36	Burkholderia vietnamiensis	Burkholderia vietnamiensis	no	Burkholderia vietnamiensis	strain=AU1233	na	Complete Genome	6835067	66.9	GCA_001718775.1	100	1.01	0	94.95		PRJNA279182	001718775	40	36	38	28	35
BCC36-FL-2-3-30-S1-D0	BCC36	Burkholderia vietnamiensis	Burkholderia vietnamiensis	no	Burkholderia vietnamiensis	strain=FL-2-3-30-S1-D0	na	Complete Genome	6815283	67.2	GCA_001718495.1	100	0.5	0	97.5		PRJNA279182	001718495	40	36	38	28	35
BCC36-G4	BCC36	Burkholderia vietnamiensis	Burkholderia vietnamiensis	no	Burkholderia vietnamiensis G4	strain=G4	na	Complete Genome	8391070	65.7	GCA_000016205.1	100	0.89	0	95.55		PRJNA10696	000016205	40	36	38	28	35
BCC36-HI2297	BCC36	Burkholderia vietnamiensis	Burkholderia vietnamiensis	no	Burkholderia vietnamiensis	strain=HI2297	na	Complete Genome	6764532	67.1	GCA_001718815.1	100	0	0	100		PRJNA279182	001718815	40	36	38	28	35
BCC36-LMG 10929	BCC36	Burkholderia vietnamiensis	Burkholderia vietnamiensis	yes	Burkholderia vietnamiensis LMG 10929	strain=LMG 10929	na	Complete Genome	6930496	66.8	GCA_000959445.1	99.6	0.08	0	99.2	assembly from type material	PRJNA235223	000959445	40	36	38	28	35
BCC36-MSMB608WGS	BCC36	Burkholderia vietnamiensis	Burkholderia vietnamiensis	no	Burkholderia vietnamiensis	strain=MSMB608WGS	na	Complete Genome	6891714	67	GCA_001718915.1	100	0.27	0	98.65		PRJNA279182	001718915	40	36	38	28	35
BCC36-WPB	BCC36	Burkholderia vietnamiensis	Burkholderia vietnamiensis	no	Burkholderia vietnamiensis	strain=WPB	na	Scaffold	6758425	67	GCA_900102765.1	100	0	0	100		PRJEB15690	900102765	40	36	38	28	35
