# Supplementary material for: Genome-based classification of Burkholderia cepacia complex provides new insight into its taxonomic status
Source: Biol Direct. 2020 Mar 4;15:6. doi: 10.1186/s13062-020-0258-5 (PMC7057466; doi:10.1186/s13062-020-0258-5)
Supplement: Supplementary file 2 — Additional file 2. List of the six strains that failed in the extraction of the full length of 16S rRNA gene sequences. [file 13062_2020_258_MOESM2_ESM.xlsx]

## Sheet: Table_S2
Table Caption:
List of six strains that failed in the extraction of the full length of 16S rRNA gene sequences.
Gene	Strain	length(bp)	sseqid	sstart	send	strand	removed
16S_rRNA	B.vietnamiensis WPB	209	FMVZ01000009.1	290451	290659	+	yes
16S_rRNA	B.dolosa PC543	90	CM002278.1	1542914	1543003	-	yes
16S_rRNA	B.pyrrocinia XXB-24	327	SGIR01000137.1	1	327	+	yes
16S_rRNA	B.ubonensis MSMB0166	547	MEBA01000044.1	154715	155259	+	yes
16S_rRNA	B.ubonensis MSMB0677	844	MEBL01000121.1	1126	1969	-	yes
16S_rRNA	B.cepacia PT02	1069	QLUZ01000059.1	1	1069	+	no
Notes:
1. yes of `removed` means the sequence was removed from phylogenetic analysis of 16S rRNA gene.
