# Supplementary material for: Genome-based classification of Burkholderia cepacia complex provides new insight into its taxonomic status
Source: Biol Direct. 2020 Mar 4;15:6. doi: 10.1186/s13062-020-0258-5 (PMC7057466; doi:10.1186/s13062-020-0258-5)
Supplement: Supplementary file 3 — Additional file 3. Accession no. list of the additional eight 16S rRNA sequences. [file 13062_2020_258_MOESM3_ESM.xlsx]

## Sheet: Table_S3
Table Caption:
Accession no. list of additional eight 16S rRNA sequences
Species	Strain	16S rRNA accession
Burkholderia latens	LMG 24064(=R-5630)	AM747628.1
Burkholderia diffusa	R-15930	AM747629.1
Burkholderia seminalis	R-24196	AM747631.1
Burkholderia metallica	R-16017	AM747632.1
Burkholderia pseudomultivorans	LMG 26883	HE962386.1
Burkholderia dolosa	LMG 18943	JX986970.1
Burkholderia stagnalis	LMG 28156	LK023502.1
Burkholderia territorii	LMG 28158	LK023503.1
